# Supplementary material for: Macro-invertebrate Biodiversity of a Coastal Prairie with Vernal Pool Habitat
Source: Biodivers Data J. 2016 Apr 27;(4):e6732. doi: 10.3897/BDJ.4.e6732 (PMC4867691; doi:10.3897/BDJ.4.e6732)
Supplement: Supplementary material 2 — Supplementary file 2 = Annotated taxonomic List of MMP Invertebrates [file biodiversity_data_journal-4-e6732-s002.xls]

## Sheet: Sheet1
Higher taxa (Phylum, Class, Order)			Family	accuracy	Subfamily	accuracy	Tribe	accuracy	Genus	accuracy	Species	accuracy	ssp. / var. / form	accuracy	Adventive	Night active	Common Name
Phylum: Annelida = Annelids
	Class: Clitellata = Annelid Worms
		Order: Haplotaxida = Earthworms & kin
			Lumbricidae	99.5	Lumbricinae	99.5	n/a	99.5	Aporrectodea	75	trapezoides	60			A		Earthworm
			Lumbricidae	99.5	Lumbricinae	99.5	Lumbricini	95	Lumbricus	95	terrestris	95			A	N	Night-crawler
			Naididae	99.5	Naidinae	99.5	Derini	99.5	Dero	99.5	limosa	95					Aqualic Worm
			Naididae	99.5	Naidinae	95	Derini	95	Aulophorus	95	vagus	75					Aquatic Worm
		Order: Rhynchobdellida = Jawless Leeches
			Glossiphoniidae	99.5	Haementeriinae	99.5	n/a	99.5	Helobdella	99.5	triserialis	99.5					Freshwater Leech
Phylum: Arthropoda = Arthropods
	Class: Arachnida = Arachnids = Spiders, Mites, Ticks, Harvestmen, Scorpions, & kin
		Order: Acari = Mites & Ticks
			Acaridae	75	Tyrophaginae	55	Tyrophagini	55	Tyrophagus	55							Acarid Mite
			Anystidae	90	Anystinae	90	Anystini	90	Anystis	85							Whirligig Mite
			Anystidae	99.5	Anystinae	85	Anystini	55	Anystis	55							Whirligig Mite
			Anystidae	99.9	Erythracarinae	99.5											Whirligig Mite
			Bdellidae	99.5													Snout Mite
			Bdellidae	99.5	Bdellinae	60	n/a	60	Bdella	60							Snout Mite
			Bdellidae	99.5	Odontoscirinae	55											Snout Mite
			Bdellidae	99.5	Odontoscirinae	85	n/a	85	Bdellodes	65							Snout Mite
			Cunaxoidinae	60													Predatory Mite
			Digamasellidae	85	Dendrolaelapinae	85	Dendrolaelapini	85	Dendrolaelaps	85							Parasitic Mite
			Eriophyidae	99.9	Eriophyinae	99.5	Aceriini	99.5	Aceria	99.5	boycei	99.5					Ragweed Gall Mite
			Tetranychidae	99.9	Bryobiinae	99.9	Bryobiini	99.9	Bryobia	99.9	praetiosa	85					Clover Mite
			Eupodidae	85	Eupodinae	85	n/a	85	Linopodes	60							Eupodid Mite
			Erythraeidae	99.5	Erythraeinae	70											Erythraeid Mite
			Erythraeidae	99.5	Balaustiinae	99	n/a	99	Balaustium	99							Erythraeid Mite
			Erythraeidae	99.5	Balaustiinae	99	n/a	99	Balaustium	99							Erythraeid Mite
			Erythraeidae	99.5	Balaustiinae	99	n/a	99	Balaustium	99	aonidophagus	85					predatory Erythraeid Mite
			Parasitidae	55												N	Mesostigmatid Mite
			Penthaleidae	99.5	n/a	99.5	n/a	99.5	Penthaleus	99.5	major	99.5					Blue Oat Mite
			Tetranychidae	99.5	Tetranychinae	75	Tetranychini	75	Oligonychus	75	platani	75					Sycamore Spider Mite
			Trombidiidae	55													Velvet Mite
			Trombidiidae	75													Velvet Mite
			Tydeidae	55													Mite
		Order: Aranea = Spiders
			Agelenidae	99.5	n/a	99.5	n/a	99.5	Hololena	90							Funnel-web Spider
			Amaurobiidae	99	Amaurobiinae	85	n/a	85	Amaurobius	85	agastus	85					Hacklemesh Weaver
			Anyphaenidae	99.5	Anyphaeninae	99.9	n/a	99.9	Anyphaena	99.5	crebrispina	85				N	Ghost Spider
			Araneidae	99	Araneinae	99	Araneini	99	Araneus	99							Orb Weaver
			Araneidae	99.5	Araneinae	99.5	Mangorini	99.5	Neoscona	99.5	crucifera	99.5					Spotted Orbweaver
			Araneidae	99.5	Araneinae	99.5	Mangorini	99.5	Neoscona	99.5	oaxacensis	99.5					Western Spotted Orbweaver
			Araneidae	99.9	Araneinae	99.7	Araneini	99.7	Araneus	99.7	andrewsi	99					Orb Weaver
			Araneidae	99.9	Araneinae	99.7	Araneini	99.7	Araneus	99.7	gemma	99.5					Orb Weaver
			Araneidae	99.99	Argiopinae	99.9	n/a	99.9	Argiope	99.9	trifasciata	99.5					Banded Argiope
			Corinnidae	85	Castianeirinae	85	n/a	85	Castianeira	85	nr cingulata	85					Ground Sac Spider
			Desidae	99.5	n/a	99.5	n/a	99.5	Badumna	99.5	longinqua	99.5			A		Australian Gray House Spider
			Dysderidae	99.5	Dysderinae	99.5	Dysderini	99.5	Dysdera	99.5	crocata	99.5			A		Woodlouse Spider
			Gnaphosidae	99.9	Herpyllinae	99.5	n/a	99.5	Scotophaeus	99.5	blackwalli	99.5			A	N	Mouse Spider
			Gnaphosidae	99	Drassodinae	55	Drassodini	55	Drassodes	55							Ground Spider
			Gnaphosidae	99.5	Drassodinae	55	Drassodini	55	Drassyllus	55							Ground Spider
			Gnaphosidae	99.99	Herpyllinae	99.9	n/a	99.9	Sergiolus	99.9	gertschi	99.5					Ground Spider
			Gnaphosidae	99.5	Zelotinae	75	Zelotini	75	Trachyzelotes	75	lyonneti	60					Ground Spider
			Gnaphosidae	99.5	Zelotinae	99.5	Zelotini	99.5	Zelotes	99.5							Ground Spider
			Linyphiidae	75													Sheetweb Spider
			Linyphiidae	99.5	Erigoninae	95	n/a	95	Erigone	95	dentosa	75					Sheetweb Spider
			Linyphiidae	99.5	Erigoninae	95	n/a	95	Spirembolus	70							Dwarf Spider
			Lycosidae	99.5	Lycosinae	85	n/a	85	Alopecosa	70	kochii	70				N	Wolf Spider
			Lycosidae	99.5	Lycosinae	99	n/a	99	Schizocosa	99	mccooki	99				N	Wolf Spider
			Lycosidae	99.9	Pardosinae	99.5	Pardosini	99.5	Pardosa	99.5							Thinlegged Wolf Spider
			Lycosidae	99.9	Pardosinae	99.5	Pardosini	95	Pardosa	95	sternalis	85					Thinlegged Wolf Spider
			Lycosidae	99.9	Piratinae	99.5	n/a	99.5	Pirata	99.5	piraticus	99.5					Pirate Wolf Spider
			Miturgidae	99.5	Eutichurinae	99.5	n/a	99.5	Cheiracanthium	99.5	inclusum	99.5					Longlegged Sac Spider
			Oecobiidae	99.9	n/a	99.9	n/a	99.9	Oecobius	99.9	navus	99.5			A		Wall Spider
			Oxyopidae	99.9	n/a	99.9	n/a	99.9	Oxyopes	99.9	salticus	99.9					Striped Lynx Spider
			Oxyopidae	99.99	n/a	99.5	n/a	99.5	Peucetia	99.5	viridans	99.5					Green Lynx Spider
			Philodromidae	99.99	Philodrominae	99.99	Thanatini	99.99	Tibellus	99.9	chamberlini	99.5					Slender Crab Spider
			Pholcidae	99.5	n/a	99.5	n/a	99.5	Psilochorus	99.5	caiforniae	98					Cellar Spider
			Pholcidae	99.5	n/a	99.5	n/a	99.5	Psilochorus	99.5	nr. hesperus	99.5					Cellar Spider
			Salticidae	99.9	Heliophaninae	99.5	n/a	99.5	Menemerus	99.5	bivittatus	99.5			A		Gray Wall Jumper
			Salticidae	99.99	Pelleninae	95	n/a	95	Habronattus	95	americanus	95					Jumping Spider
			Salticidae	99.9	Pelleninae	99	n/a	99	Habronattus	99	americanus	98					Jumping Spider
			Salticidae	99.99	Pelleninae	99.9	n/a	99.9	Habronattus	99.5	pyrrithrix	99.5					Jumping Spider
			Salticidae	99.99	Pelleninae	99.99	n/a	99.99	Habronattus	99.99	signatus	70					Jumping Spider
			Salticidae	99.99	Pelleninae	99.5	n/a	99.5	Habronattus	99.5	tarsalis	99.5					Jumping Spider
			Salticidae	99.9	Dendryphantinae	99.5	n/a	99.5	Phidippus	99.5	audax	99.5					Bold Jumper
			Salticidae	99.99	Dendryphantinae	99.9	n/a	99.9	Sassacus	99.9	vitis	99.5					Jumping Spider
			Tetragnathidae	99.99	Tetragnathinae	99.5	n/a	99.5	Tetragnatha	99.5	versicolor	99.5					Longjawed Orb Weaver
			Theridiidae	99	Latrodectinae	95	n/a	95	Crustulina	95	sticta	95					Cobweb Spider
			Theridiidae	99.5	Latrodectinae	99.5	n/a	99.5	Latrodectus	99.9	hesperus	99.9					Western Black Widow
			Theridiidae	99.5	Latrodectinae	99.5	n/a	99.5	Steatoda	99.5	grossa	99.5			A		False Black Widow
			Theridiidae	99.5	Theridiinae	99.5	Theridiini	99.5	Theridion	99.5	melanurum	99.5				N	Cobweb Spider
			Theridiidae	99.5	Theridiinae	99.5	Theridiini	99.5	Theridion	99.5	murarium	95					Cobweb Spider
			Thomsidae	99.99	Thomisinae	99.9	Diaeini	99.9	Xysticus	99.9	californicus	99.5					Ground Crab Spider
		Order: Solpugida = Sun Spiders
			Eremobatidae	99.99	Eremobatinae	99.5	n/a	99.5	Eremobates	99.5	kraepelini	98				N	Solpugid = Sun Spider
			Eremobatidae	99	Therobatinae	85	n/a	85	Hemerotrecha	65	californica	60					Solpugid = Sun Spider
	Class: Branchiopoda = Fairy Shrimp, Waterfleas, & kin
		Order: Anostraca = Fairy Shrimp
			Branchinectidae	99.9	Branchinectinae	99.5	n/a	99.5	Branchinecta	99.5	lindahli	99.5					Fairy Shrimp
			Branchinectidae	99.9	Branchinectinae	99.5	n/a	99.5	Branchinecta	99.5	lindahli x sandiegoensis	99.5					Fairy Shrimp
		Order: Cladocera = Waterfleas
			Chydoridae	99.5	Chydorinae	99.5	n/a	99.5	Chydorus	90							Waterflea
			Daphniidae	99.9	Daphniinae	99.5	n/a	99.5	Daphnia	99.5	laevis	65					Waterflea
	Class: Chilopoda = Centipedes
		Order: Lithobiomorpha = Stone Centipedes
			Henicopidae	55													Stone Centipede
	Class: Collembola = Springtails
		Order: Entomobryomorpha = Elongate-bodied Springtails
			Entomobryidae	99.9	Entomobryinae	99.5	Entomobryini	99.5	Entomobrya	99.5	atrocincta	99.5				N	Slender Springtail
			Entomobryidae	99.99	Seirinae	99.9	Seirini	99.5	Seira	99.5	bipunctata	99.5					Slender Springtail
			Isotomidae	99.9	Proisotominae	99.99	n/a	99.99	Ballastrura	99.9							Elongate-bodied Springtail
			Isotomidae	65	Proisotominae	60	n/a	60	Folsomia	60							Elongate-bodied Springtail
		Order: Symphypleona = Globular Springtails
			Dicyrtomidae	85	Dicyrtominae	75											Globular Springtail
			Dicyrtomidae	75	Ptenothricinae	60	n/a	60	Ptenothix	60							Globular Springtail
	Class: Insecta = Insects
		Order: Coleoptera = Beetles
			Anobiidae	99.5	Ernobiinae	99.5	Ernobiini	99.5	Ernobius	99						N	Pine Boring Beetle
			Anobiidae	99.5	Ernobiinae	99.5	Ozognathini	99.5	Ozognathus	99.5	cornutus	99.5					Acorn Anobiid
			Anobiidae	99.99	Ptilininae	99.9	Ptilinini	99.9	Ptilinus	99.9	flavipennis	85					Death-watch Beetle
			Bostrichidae	99.5	Psoinae	99.5	Polycaonini	99.5	Polycaon	99.5	stoutii	99.5					Black Polycaon
			Cantharidae	99.5	Cantharinae	99.5	Cantharini	99.5	Pacificanthia	99.5	consors	99.5					Brown Leatherwing Beetle
			Carabidae	99.9	Carabinae	99.5	Carabini	99.5	Calosoma	99.5	semilaeve	99					Common Calosoma
			Carabidae	99.99	Harpalinae	65	Harpalini	65	Harpalus	65							Ground Beetle
			Carabidae	99.99	Harpalinae	99.5	Harpalini	99.5	in Stenolophina-subtribe	99.5							rectangular Ground Beetle
			Carabidae	99.99	Harpalinae	99.99	Lebiini	99.9	Apristus	85							Ground Beetle
			Carabidae	99.9	Harpalinae	99.9	Lebiini	99.9	Axinopalpus	99.9	biplagiatus	85					Colorful Foliage Ground Beetle
			Carabidae	99.9	Harpalinae	99	Platynini	98	Agonum	98							Ground Beetle
			Carabidae	99.9	Harpalinae	99	Platynini	98	Agonum	75							Ground Beetle
			Carabidae	99.5	Harpalinae	99.5	Platynini	99.5	Calathus	99.5	ruficollis	99.5	ruficollis	99.5			Ground Beetle
			Carabidae	99.9	Harpalinae	99.5	Pterostichini	90	Pristonychus	90	complanatus	90					Black Ground Beetle
			Carabidae	99.99	Harpalinae	99.9	Zabrini	99.9	Amara	99.5							Seed-eating Ground Beetle
			Carabidae	99.99	Harpalinae	99.9	Zabrini	99.9	Amara	99.5	immunda	85				N	Seed-eating Ground Beetle
			Carabidae	99.99	Trechinae	85	Bembidiini	85	Bembidion	85						N	Minute Ground Beetle
			Cerambycidae	99.99	Cerambycinae	99.9	Phoracanthini	99.9	Phoracantha	99.9	recurva	99.5			A		Eucalyptus Borer
			Chrysomelidae	99.5	Bruchinae	99.5	n/a	99.5	Stator	99.5	pruininus	99.5					Seed Beetle
			Chrysomelidae	99.99	Cassidinae	99.99	Chalepini	99.5	Stenopodius	99.5	insularis	95					Hispine Beetle
			Chrysomelidae	99.99	Chrysomelinae	99.9	Chrysomelini	99.9	Trachymela	99.9	sloanei	99.5			A		Australian Tortoise Beetle
			Chrysomelidae	99.5	Cryptocephalinae	99.5	Cryptocephalini	99.5	Diachus	99.5	auratus	99.5					Bronze Leaf Beetle
			Chrysomelidae	99.99	Cryptocephalinae	99.99	Cryptocephalini	99.9	Pachybrachis	99.9	turbidus	75					Case-bearing Leaf Beetle
			Chrysomelidae	99.99	Eumolpinae	99.99	Eumolpini	99.5	Chrysochus	99.5	cobaltinus	99.5					Cobalt Milkweed Beetle
			Chrysomelidae	99.5	Eumolpinae	99	Typophorini	99	Paria	99							Leaf Beetle
			Chrysomelidae	99.9	Galerucinae	99.9	Alticini	99.9	Crepidodera	95	opulenta	95					Flea Beetle
			Chrysomelidae	99.99	Galerucinae	99.99	Luperini	99.99	Diabrotica	99.99	balteata	99.5	(blue variety)				Banded Cucumber Beetle
			Chrysomelidae	99.99	Galerucinae	99.99	Luperini	99.99	Diabrotica	99.9	undecimpunctata	99.9	howardi	99.9			Spotted Cucumber Beetle
			Chrysomelidae	99.99	Galerucinae	99.99	Luperini	99.99	Diabrotica	99.9	undecimpunctata	99.9	undecimpunctata	99.9			Western Spotted Cucumber Beetle
			Coccinellidae	99.99	Chilocorinae	99.9	Chilocorini	99.9	Axion	65	plagiatum	65					Lady Beetle
			Coccinellidae	99.99	Chilocorinae	99.99	Chilocorini	99.99	Chilocorus	99.9	bipustulatus	99.5					Armored Scale Lady Beetle
			Coccinellidae	99.99	Coccinellinae	99.9	Coccinellini	99.9	Coccinella	99.9	septempunctata	99.5			B		Seven-spot Ladybird Beetle
			Coccinellidae	99.99	Coccinellinae	99.5	Coccinellini	99.5	Cycloneda	99.5	sanguinea	99.5					Spotless Ladybird Beetle
			Coccinellidae	99.99	Coccinellinae	99.9	Coccinellini	99.9	Harmonia	99.9	axyridis	99.9			B		Asian Ladybird Beetle
			Coccinellidae	99.99	Coccinellinae	99.99	Coccinellini	99.99	Hippodamia	99.5	convergens	99.5					Convergent Ladybird Beetle
			Coccinellidae	99.5	Coccinellinae	99.5	Psylloborini	99.5	Psyllobora	99.5	vigintimaculata	99.5					Mildew-eating Lady Beetle
			Coccinellidae	99.99	Scymninae	99.99	Scymnini	99.5	Cryptolaemus	99.5	montrouzieri	99.5			B		Mealybug Destroyer
			Coccinellidae	99.99	Scymninae	99.99	Scymnini	99.9	Scymnus	99.9	loewii	99.5					Dusky Lady Beetle
			Coccinellidae	99.9	Scymninae	99.5	Stethorini	99.5	Stethorus	99.5	punctum	99.5	picipes	99			Spider Mite Destroyer
			Corylophidae	99.9	Corylophinae	99.5	Sericoderini	99.5	Sericoderus	99.5	debilis	60					Minute Hooded Beetle
			Corylophidae	85													Minute Hooded Beetle
			Corylophidae	99.9	Corylophinae	99.9	Sericoderini	99.9	Sericoderus	99.9	quadratus	60					Minute Hooded Beetle
			Curculionidae	90	Cossoninae	55	Rhyncolini	55									Weevil
			Curculionidae	99.99	Curculioninae	99.9	Anthonomini	99.5	Epimechus	99	mobilis	99					Weevil
			Curculionidae	99.5	Curculioninae	99.5	Erirhinini	99	Anthonomus	99	nr tenuis	99					Wetland Weevil
			Curculionidae	99.99	Curculioninae	99.9	Erirhinini	99.9	Smicronyx	99.9	sordidus	99.5					Grey Sunflower Seed Weevil
			Curculionidae	99.9	Curculioninae	99.9	Tychiini	99.99	Tychius	99.99	lineelus	99.99			A		Weevil
			Curculionidae	99.99	Dryophthorinae	99.99	Sphenophorini	99.95	Sphenophorus	99.95	australis	99.5	australis	99.5			Billbug
			Curculionidae	99.5	Dryophthorinae	99.5	Sphenophorini	99.5	Sphenophorus	99.5	phoeniciensis	95					Phoenician Billbug
			Curculionidae	99.5	Dryophthorinae	99.5	Sphenophorini	99.5	Sphenophorus	99.5	simplex	99.5					Billbug
			Curculionidae	99.5	Dryophthorinae	99.5	Sphenophorini	99.5	Sphenophorus	99.5	venatus	90	glyceriae	85			Billbug
			Curculionidae	99.99	Entiminae	99.9	Naupactini	99.5	Naupactus	99.5	cervinus	99.5			A		Fuller Rose Beetle
			Curculionidae	99.99	Entiminae	99.99	Peritelini	99.5	Thinoxenus	99.5	squalens	99.5				N	Broad-nosed Weevil
			Curculionidae	99.99	Erirhininae	99.9	Sitonini	99.9	Sitona	99.5	cylindricollis	99.5			A		Sweetclover Weevil
			Curculionidae	99.99	Erirhininae	99.99	Stenopelmini	99.99	Notiodes	99.99	punctatus	99.9					Weevil
			Curculionidae	99.99	Erirhininae	99.9	Stenopelmini	99.5	Stenopelmus	99.5	rufinasus	99.5				N	Azolla Weevil
			Cryptophagidae	99.99	Atomariinae	99.5	Atomariini	99.5	Atomaria	99.5	puella	98					Silken Fungus Beetle
			Cryptophagidae	99.5	Cryptophaginae	99.5	Cryptophagini	99.5	Cryptophagus	99							Silken Fungus Beetle
			Dermestidae	99.5	Dermestinae	99.5	Dermestini	99.5	Dermestes	99.5	talpinus	99.5					Larder Beetle
			Dytiscidae	99.9	Agabinae	99	Agabini	99	Agabus	99							Predaceous Diving Beetle
			Dytiscidae	80	Colymbetinae	70											Predaceous Diving Beetle
			Dytiscidae	99.5	Hydroporinae	99.5	Bidessini	99	Liodessus	90							Predaceous Diving Beetle
			Dytiscidae	99.5	Hydroporinae	85	Hydroporini	85	Hygrotus	85							Predaceous Diving Beetle
			Dytiscidae	99.99	Colymbetinae	99.9	Colymbetini	99.9	Rhantus	99.5	gutticollis	99.5					Predaceous Diving Beetle
			Heteroceridae	99.99					Lanternarius	99.5	brunneus	85				N	Variegated Mud-loving Beetle
			Histeridae	99.99	Saprininae	99.99	n/a	99.99	Xerosaprinus	99.5						N	Clown Beetle
			Hydrophilidae	99.5	Hydrophilinae	99.5	Hydrophilini	99.5	Tropisternus	99.5	lateralis	99.5					Water Scavenger Beetle
			Latridiidae	99.5	Corticariinae	99.5	Corticariini	99.5	Corticaria	99.5	serrata	99.5				N	Minute Brown Scavenger Beetle
			Latridiidae	99.99	Corticariinae	99.9	Corticariini	99.9	Corticarina	99.5	herbivagans	95					Minute Brown Scavenger Beetle
			Latridiidae	99.5	Latridiinae	99.5	Latridiini	98	Aridius	98	nodifer	98					Minute Brown Scavenger Beetle
			Meloidae	99.5	Meloinae	98	Epicautini	70	Epicauta	70							Blister Beetle
			Melyridae	99.9	Malachiinae	99.5	Malachiini	99.5	Attalus	99	unicolor	98					Soft-winged Flower Beetle
			Melyridae	99.99	Malachiinae	99.99	Malachiini	99.99	Collops	99.9	vittatus	90					Soft-winged Flower Beetle
			Mycetophagidae	95	Mycetophaginae	95	Typhaeini	95	Typhaea	95	stercorea	85					Hairy Fungus Beetle
			Monotomidae	99.5	Monotominae	99.5	Monotomini	99.5	Monotoma	99.5	picipes	65					Root-eating Beetle
			Scarabaeidae	99.99	Aphodiinae	99.95	Aphodiini	99.95	Aphodius	99.95	fimetarius	99.5			A		European Dung Beetle
			Scarabaeidae	99.9	Aphodiinae	99.99	Aphodiini	99.99	Aphodius	99.99	militaris	99					Aphodiine Dung Beetle
			Scarabaeidae	99.99	Aphodiinae	99.95	Aphodiini	99.95	Dellacasiellus	99.5	pseudofucosus	99					Dung Beetle
			Scarabaeidae	99.99	Cetoniinae	99.99	Gymnetini	99.99	Cotinis	99.99	mutabilis	99.5					Green Fruit Beetle
			Scarabaeidae	99.99	Dynastinae	99.99	Cyclocephalini	99.99	Cyclocephala	99.9	longula	85				N	Southern Masked Chafer
			Scarabaeidae	99.99	Melolonthinae	99.5	Sericini	99.5	Serica	99.5						N	Chafer
			Scarabaeidae	99.99	Melolonthinae	99.99	Sericini	99.5	Serica	99.5						N	Chafer
			Staphylinidae	99.99	Aleocharinae	85											Rove Beetle
			Staphylinidae	99.99	Aleocharinae	85											Rove Beetle
			Staphylinidae	99.99	Aleocharinae	85											Rove Beetle
			Staphylinidae	99.99	Aleocharinae	75	Athetini	70	Philhygra	60							Rove Beetle
			Staphylinidae	99.99	Aleocharinae	95	Lomechusini	65	Meronera	65							Rove Beetle
			Staphylinidae	99.99	Oxytelinae	75											Rove Beetle
			Staphylinidae	99.99	Oxytelinae	99.5	Thinobiini	99.5	Carpelimus	95						N	Spiny-legged Rove Beetle
			Staphylinidae	99.99	Paederinae	99.5	Paederini	99.5	Paederus	99.5	compotens	99.5					Rove Beetle
			Staphylinidae	99.99	Paederinae	75	Pinophilini	70	Pinophilus	65							Rove Beetle
			Staphylinidae	99.99	Staphylininae	99.9	Staphylinini	99.5	Dinothenarus	99.5	saphyrinus	90					Large Rove Beetle
			Staphylinidae	99.99	Staphylininae	99.9	Staphylinini	99.5	Ocypus	99.5	olens	99.5					Devil's Coach Horse
			Staphylinidae	99.99	Staphylininae	99.9	Staphylinini	99.5	Platydracus	99.5	tarsalis	85					Large Rove Beetle
			Tenebrionidae	99.9	Opatrinae	99.9	Opatrini	99.9	Blapstinus	99.9	brevicollis	99.5					Darkling Beetle
			Tenebrionidae	99.99	Pimeliinae	99.9	Cnemeplatiini	99.9	Lepidocnemeplatia	99.5	sericea	99.5				N	Darkling Beetle
			Tenebrionidae	99.99	Pimeliinae	99.9	Coniontini	99.5	Coniontis	85							Darkling Beetle
			Tenebrionidae	99.99	Pimeliinae	99.9	Coniontini	99.5	Coniontis	99						N	Darkling Beetle
			Tenebrionidae	99.9	Pimeliinae	85	Edrotini	65									Darkling Beetle
			Tenebrionidae	99.99	Pimeliinae	98	Edrotini	90									Darkling Beetle
			Tenebrionidae	99.9	Pimeliinae	99.5	Nyctoporini	99.5	Nyctoporis	99.5	carinata	99.5					Darkling Beetle
			Tenebrionidae	99.99	Tenebrioninae	99.9	Amphidorini	99.9	Eleodes	99.5	acuticaudus	85					Stink Beetle
			Tenebrionidae	100.99	Tenebrioninae	99.9	Amphidorini	99.9	Eleodes	99.9	littoralis	95					Woolly Darkling Beetle
			Tenebrionidae	99.9	Tenebrioninae	99.9	Amphidorini	99.9	Eleodus	99.9	osculans	99.9					Wooly Darkling Beetle
			Tenebrionidae	99	Tenebrioninae	90	Ulomini	75									Darkling Beetle
			Tenebrionidae	99.9	Tenebrioninae	99.9	Ulomini	99.9	Uloma	99.5	longula	99.5					Darkling Beetle
		Order: Dermaptera = Earwigs
			Anisolabididae	99.9	Carcinophorinae	99.5	n/a	99.5	Euborellia	99.5	annulipes	99.5					Ring-legged Earwig
			Forficulidae	99.5	Forficulinae	99.5	n/a	99.5	Forficula	99.5	auricularia	99.5			A	N	European Earwig
		Order: Diptera = Flies, Mosquitos, & kin
			Agromyzidae	99.99	Agromyzinae	95	Agromyzini	95	Agromyza	95							Leaf Miner Fly
			Agromyzidae	99.5	Agromyzinae	90	Ophiomyiini	70	Melanagromyza	70	minimoides	52					Leaf Miner Fly
			Agromyzidae	99.5	Agromyzinae	95	Ophiomyiini	90	Melanagromyza	90	virides	85					Leaf Miner Fly
			Agromyzidae	65	Phytomyzinae	65	n/a	65	Cerodontha	60							Leaf Miner Fly
			Agromyzidae	99.99	Phytomyzinae	99.5	n/a	99.5	Liriomyza	99.5	pictella	65					Leaf Miner Fly
			Agromyzidae	99.99	Phytomyzinae	90	n/a	90	Phytobia	85							Leaf Miner Fly
			Antomyiidae	70												N	Root-maggot Fly
			Antomyiidae	70												N	Root-maggot Fly
			Antomyiidae	95													Root-maggot Fly
			Antomyiidae	95	Anthomyiinae	70	Anthomiini	65									Root-maggot Fly
			Antomyiidae	95	Anthomyiinae	90	Anthomiini	85									Root-maggot Fly
			Antomyiidae	99.9	Anthomyiinae	99	Anthomiini	95	cf. Anthomyia	95							Root-maggot Fly
			Asilidae	99.99	Asilinae	99.99	Asilini	99.99	Machimus	99.9							Robber Fly
			Asilidae	99.99	Asilinae	99.99	Asilini	99.99	Mallophora	99.9	fautrix	99.5					Bee-killer
			Asilidae	99.99	Asilinae	99.99	Asilini	99.9	Negasilus	99.99	astutus	99.99					Robber Fly
			Asilidae	99.99	Asilinae	99.9	Asilini	99.9	Stenopogon	99.5							Robber Fly
			Asilidae	99.99	Dasypogoninae	99.9	Dasypogonini	99.9	Saropogon	99.5	luteus	99.5					Robber Fly
			Bibionidae	99.99	Bibioninae	99.99	n/a	99.99	Dilophus	99.5	orbatus	85					March Fly
			Bibionidae	99.99	Bibioninae	99.99	n/a	99.99	Dilophus	99.5	strigilatus	65					March Fly ('Love Bug')
			Bibionidae	99.99	Bibioninae	99.5	n/a	99.5	Dilophus	99.5	tibialis	75				N	March Fly ('Love Bug')
			Bombyliidae	99.99	Anthracinae	99.95	Exoprosopini	99.95	Ligyra	99.95	gazophylax	99.95					Bee Fly
			Bombyliidae	99.99	Anthracinae	99.99	Villini	99.9	Hemipenthes	99.5	sinuosa	99.5					Bee Fly
			Bombyliidae	99.99	Anthracinae	99.99	Villini	99.9	Thyridanthrax	99.9	atratus	99.5					Bee Fly
			Bombyliidae	99.99	Anthracinae	99.99	Villini	99.9	Thyridanthrax	99.9	nugator	99.5					Bee Fly
			Bombyliidae	99.9	Anthracinae	99.5	Villini	99	Villa	99	nr. agrippina	99					Bee Fly
			Bombyliidae	99.99	Anthracinae	99.95	Villini	99.9	Villa	99.9	agrippina	99.5					Bee Fly
			Bombyliidae	99.99	Anthracinae	99.95	Villini	99.9	Villa	99.9	atrata	99.5					Bee Fly
			Bombyliidae	99.99	Anthracinae	99.9	Villini	99.9	Villa	99.5	nr. inops	99.5					Bee Fly
			Bombyliidae	99.99	Anthracinae	99.9	Villini	99.9	Villa	99.5	lateralis	99.5					Bee Fly
			Bombyliidae	99.99	Toxophorinae	99.9	Gerontini	99.9	Geron	99.5	nigripes	55					Bee Fly
			Calliphoridae	99.99	Calliphorinae	99.99	Luciliini	99.99	Lucilia	99.99	mexicana	99					Green Bottle Fly
			Calliphoridae	99.99	Calliphorinae	99.99	Luciliini	99.99	Lucilia	99.99	sericata	80					Green Bottle Fly
			Calliphoridae	99.5	Polleniinae	99.5	Polleniini	99.5	Pollenia	99.5	rudis	80					Cluster Fly
			Cecidomyiidae	99.99	Cecidomyiinae	85	Cecidomyiidi	85								N	Gall Midge
			Cecidomyiidae	99.99	Cecidomyiinae	85	Lasiopteridi	85	Rhopalomyia	85						N	Gall Midge
			Chamaemyiidae	99.5	Chamaemyiinae	99.5	Leucopini	99.5	Leucopis	99.5	americana	55				N	Aphid Fly
			Chironomidae	99.5												N	Midge
			Chironomidae	99.5												N	Midge
			Chironomidae	99.5												N	Midge
			Chironomidae	99.9	Chironominae	95	Chironomini	85									Midge
			Chironomidae	99.9	Chironominae	99.5	Chironomini	99	Axarus	75						N	Midge
			Chironomidae	99.9	Chironominae	95	Chironomini	60	Chironomus	60							Midge
			Chironomidae	99.5	Chironominae	99.5	Chironomini	99	Chironomus	95						N	Midge
			Chironomidae	99.5	Chironominae	99.5	Chironomini	99	Chironomus	95						N	Midge
			Chironomidae	99.5	Chironominae	99.5	Chironomini	99	Chironomus	85							Midge
			Chironomidae	99.95	Chironominae	99	Chironomini	99	Chironomus	98							Midge
			Chironomidae	99.95	Chironominae	99	Chironomini	99	Chironomus	85						N	Midge
			Chironomidae	99.9	Tanypodinae	99.9	Procladiini	99.9	Procladius	99.9	cf. Holotanypus	99.5				N	Midge
			Chloropidae	99.99	Chloropinae	99.5	n/a	99.5	Chlorops	85							Grass Fly
			Chloropidae	99.99	Chloropinae	99.5	n/a	99.5	Thaumatomyia	65							Grass Fly
			Chloropidae	99.99	Chloropinae	99.5	n/a	99.5	Thaumatomyia	60							Grass Fly
			Chloropidae	99.5	Oscinellinae	99	Oscinellini	85	nr Oscinella	85							Frit Fly
			Chloropidae	99.5	Siphonellopsinae	85	n/a	85	nr Apotropina	85							Frit Fly
			Culicidae	99.9	Culicinae	99.9	Culicini	99.5	Culex	99.5	pipiens	99.5	quinquefasciatus	85		N	Southern House Mosquito
			Culicidae	99.9	Culicinae	99.9	Culicini	99	Culex	99	tarsalis	99				N	Western Encephalitis Mosquito
			Culicidae	99.99	Culicinae	99.5	Culicini	99.5	Culiseta	99.5	incidens	99.5				N	Cool Weather Mosquito
			Dolichopodidae	99.5	Diaphorinae	99.5	n/a	99.5	Achradocera	99.5	arcuata	65					Longlegged Fly
			Dolichopodidae	99.99	Dolichopodinae	98	Dolichopodini	95	Dolichopus	85							Longlegged Fly
			Dolichopodidae	99.99	Dolichopodinae	65	Dolichopodini	65	Pelastoneurus	65	occidentalis	55					Longlegged Fly
			Dolichopodidae	99.5	Hydrophorinae	70	Hydrophorini	70	Hydrophorus	70							Aquatic Long-legged Fly
			Dolichopodidae	99.9	Medeterinae	99.5	Medeterini	99.5	Medetera	99.5	similis	60				N	Longlegged Fly
			Dolichopodidae	99.9	Medeterinae	99.5	Medeterini	99.5	Medetera	99.5	californiensis	98					Longlegged Fly
			Dolichopodidae	99.9	Sciapodinae	85	n/a	85	Condylostylus	85							Longlegged Fly
			Drosophilidae	99.5	Drosophilinae	95	Drosophilini	95	Drosophila	95						N	Vinagar Fly
			Ephydridae	99.5	Ephydrinae	85	Ephydrini	85	Ephydra	85	gracilis	60					Shore Fly
			Ephydridae	99.5	Ephydrinae	99	Ephydrini	99	Ephydra	99	niveiceps	98					white-faced Shore Fly
			Ephydridae	99.5	Ephydrinae	60	Scatellini	60	Paracoenia	60							Shore Fly
			Ephydridae	99.5	Ephydrinae	99.9	Scatellini	99.9	Scatella	99.9	stagnalis	75					Shore Fly
			Ephydridae	99.9	Hydrelliinae	98	Hydrelliini	75	Hydrellia	75							Shore Fly
			Ephydridae	99.9	Hydrelliinae	90	Hydrelliini	90	Hydrellia	90							Shore Fly
			Ephydridae	99	Hydrelliinae	90	Ilytheini		Ilythea	55							Shore Fly
			Ephydridae	99.5	Hydrelliinae	95	Notiphilini	75	Notiphila	75	nr caudata	75				N	Shore Fly
			Ephydridae	99.5	Parydrinae	99	n/a	99	Brachydeutera	99	argentata	90					Shore Fly
			Fanniidae	99.5	n/a	99.5	n/a	99.5	Fannia	99.5							Fanniid Fly
			Fanniidae	99.5	n/a	99.5	n/a	99.5	Fannia	99.5							Fanniid Fly
			Heleomyzidae	99.5	Heleomyzinae	70	Heleomyzini	60	Pseudoleria	60							Heleomyzid Fly
			Heleomyzidae	99.5	Suilliinae	65	Suilliini	65	Suillia	65						N	Heliomyzid Fly
			Heleomyzidae	99.9	Trixoscelidinae	60	Trixoscelidini	60	Trixoscelis	60							Heleomyzid Fly
			Heleomyzidae	99.9	Trixoscelidinae	99.5	Trixoscelidini	99.5	Trixoscelis	99.5	nuda	85					Heleomyzid Fly
			Lauxaniidae	99.5	Homoneurinae	99.5	n/a	99.5	Homoneura	99.5	occidentalis	85					Lauxaniid Fly
			Lauxaniidae	99	Lauxaniinae	70	n/a	70	Meiosimyza	70							Lauxaniid Fly
			Lauxaniidae	99.5	Lauxaniinae	99.5	n/a	99.5	Minettia	99.5	flaveola	99.5					Lauxaniid Fly
			Limoniidae	99.5	Chioneinae	95	Eriopterini	95	Erioptera	95	caliptera	95				N	Crane Fly
			Limoniidae	99.5	Chioneinae	99.5	Eriopterini	99.5	Erioptera	99.5	pilipes	99.5					Limoniid Crane Fly
			Limoniidae	99.5	Chioneinae	99.9	Eriopterini	99.9	Symplecta	99.9	cana	99.9				N	Limoniid Crane Fly
			Lonchaeidae	99.5	Lonchaeinae	75	Lonchaeini	75	Lonchaea	75	striatifrons	60					Lance Fly
			Muscidae	85													Muscid Fly
			Muscidae	75	Azeliinae	65	Reinwardtiini	65	Muscina	65	dorsilinea	60					Muscid Fly
			Muscidae	99.5	Coenosiinae	85	Coenosiini	85	Coenosia	85						N	Tiger Fly
			Muscidae	95	Coenosiinae	95	Coenosiini	95	Coenosia	95						N	Tiger Fly
			Muscidae	99.5	Coenosiinae	99.5	Coenosiini	85	Coenosia	85							Tiger Fly
			Muscidae	99.5	Coenosiinae	99.5	Coenosiini	99.5	Coenosia	98	tigrina	95					Tiger Fly
			Muscidae	99.99	Coenosiinae	99.5	Coenosiini	99.5	Coenosia	99.5	nr. tigrina					N	Tiger Fly
			Muscidae	99.99	Coenosiinae	99.5	Coenosiini	99.5	Coenosia	99.5	nr. tigrina	98					Tiger Fly
			Muscidae	99.99	Coenosiinae	99.5	Coenosiini	99.5	Coenosia	99.5	nr. tigrina						Tiger Fly
			Muscidae	99.9	Muscinae	99	Reinwardtiini	99	Synthesiomyia	99	nudiseta	99					Necrophagous Fly
			Mycetophilidae	99.5													Fungus Gnat
			Mycetophilidae	99.9	Mycetophilinae	99.5	Mycetophilini	99.5	Mycetophila	99.5	perita	75				N	Fungus Gnat
			Mycetophilidae	99.5	Sciophilinae	99	Leiini	95	Leia	95	striata	90	var. a	85			Fungus Gnat
			Mycetophilidae	99.5	Sciophilinae	99.9	Leiini	99.9	Leia	99.9							Fungus Gnat
			Phoridae	99.9	Metopininae	99.5	Metopinini	99.5	Megaselia	99.5	scalaris	85					Humpback Fly
			Platypezidae	99.9	Platypezidae	99.9	n/a	99.9	Plesioclythia	99.5	agarici	90					Flat-footed Fly
			Psychodidae	99.99	Psychodinae	99	Psychodini	99	Psychoda	99						N	Moth Fly
			Rhagionidae	99.9	Rhagioninae	99.5	n/a	99.5	Chrysopilus	99.5							Snipe Fly
			Sarcophagidae	99	Miltogramminae	85	Miltogrammini	85	Senotainia	85	nana	55				N	Sattelite Fly
			Sarcophagidae	99.5	Sarcophaginae	95											Flesh Fly
			Sarcophagidae	99.5	Sarcophaginae	98											Flesh Fly
			Sarcophagidae	99.9	Sarcophaginae	99.5	Raviniini	90	Ravinia	95							Flesh Fly
			Sarcophagidae	99.9	Sarcophaginae	99.5	Raviniini	99	Ravinia	99	stimulans	55					Flesh Fly
			Scatopsidae	99.9	Scatopsinae	99	Rhegmoclematini	65	Rhegmoclemina	65	melanderi	55					Minute Black Scavenger Fly
			Sciaridae	99.5												N	Dark-winged Fungus Gnat
			Sciaridae	99.5	Sciarinae	75	Sciarini	75	Sciara	75							Dark-winged Fungus Gnat
			Sciaridae	99.5	Sciarinae	75	Bradysiini	75	Bradysia	75						N	Dark-winged Fungus Gnat
			Sciomyzidae	99.9	Sciomyzinae	99.5	Sciomyzini	99.5	Pherbellia	99.5	vitalis	99.5					Marsh Fly
			Sciomyzidae	99.99	Sciomyzinae	99.5	Tetanocerini	99.5	Sepedon	99.5	pacifica	99					March Fly
			Sciomyzidae	99.9	Tetanocerinae	99.9	n/a	99.9	Dictya	99.9	montana	80	S. Cal. clinal form	80			Marsh Fly
			Sepsidae	99.99	Sepsinae	99.5	Sepsini	99.5	Themira	99.5	putris	99			A		Black Scavenger Fly
			Stratiomyidae	85													Soldier Fly
			Stratiomyidae	99.9	Hermetiinae	99.9	Hermetiini	99.9	Hermetia	99.9	illucens	99.5					Black Soldier Fly
			Syrphidae	99.9	Eristalinae	99.5	Eristalini	99.5	Eristalis	60							Drone Fly
			Syrphidae	99.9	Eristalinae	99	Eristalini	99	Eristalis	80	nemorum	60					Drone Fly
			Syrphidae	99.99	Eristalinae	99.9	Eristalini	99.9	Lejops	99.5	polygrammus	98			A		Hover Fly
			Syrphidae	99.99	Eristalinae	99.9	Eristalini	99.9	Palpada	99.5	alhambra	99.5					Hover Fly
			Syrphidae	99.99	Eristalinae	99.9	Eristalini	99.9	Palpada	99.5	mexicana	99.5					Hover Fly
			Syrphidae	99.99	Eristalinae	99.5	Xylotini	99.5	Syritta	99.5	pipiens	99.5					Hover Fly
			Syrphidae	99.9	Syrphinae	99.9	Paragini	99.5	Paragus	99.5	haemorrhous	95					Hover Fly
			Syrphidae	99.9	Syrphinae	99.9	Syrphini	99.9	Allograpta	99.9	obliqua	99.5					Chevroned Hover Fly
			Syrphidae	99.9	Syrphinae	99.9	Syrphini	99.9	Eupeodes	99.9	volucris	99.5					Bird Hover Fly
			Syrphidae	99.9	Syrphinae	99.9	Syrphini	99.9	Scaeva	99.5	pyrastri	99.5					Hover Fly
			Syrphidae	99.99	Syrphinae	99.9	Syrphini	99.5	Sphaerophoria	99.5	contigua	99.5					Hover Fly
			Syrphidae	99.9	Syrphinae	99.9	Toxomerini	99.9	Toxomerus	99.9	marginatus	99.5					Hover Fly
			Syrphidae	99.9	Syrphinae	99.9	Toxomerini	99.9	Toxomerus	99.9	occidentalis	99.5					Hover Fly
			Tachinidae	98	Dexiinae	60	Dexiini	60	Ptilodexia	60							Bristle Fly
			Tachinidae	99.5	Dexiinae	85	Voriini	85									Bristle Fly
			Tachinidae	99.5	Dexiinae	55	Zeliini	55	Zelia	55							Bristle Fly
			Tachinidae	99.5	Exoristinae	85											Bristle Fly
			Tachinidae	99.99	Phasiinae	99.9	Gymnosomatini	99.9	Gymnosoma	99.5	occidentale	60					Bristle Fly
			Tachinidae	99.99	Phasiinae	99.99	Phasiini	99.99	Phasia	99.99	aldrichii	99.5					Bristle Fly
			Tachinidae	99.99	Tachininae	99.5	Dejeaniini	99.5	Archytas	99.5	apicifer	99.5					Bristle Fly
			Tachinidae	99.9	Tachininae	80	Tachinini	75	Peleteria	75							Bristle Fly
			Tephritidae	99.99	Tephritinae	99.99	Eutretini	99.99	Paracantha	99.9	cultaris	99					Fruit Fly
			Tephritidae	99.99	Tephritinae	99.99	Tephrellini	99.5	Trupanea	99.5	femoralis	99.5					Fruit Fly
			Tephritidae	99.99	Tephritinae	99.99	Tephrellini	99.99	Trupanea	99.9	wheeleri	99					Fruit Fly
			Tephritidae	99.99	Tephritinae	99.9	Tephritini	99.9	Euaresta	99.9	aequalis	99.5					Fruit Fly
			Tephritidae	99.99	Tephritinae	99.99	Tephritini	99.99	Euaresta	99.9	stigmatica	99.5					Fruit Fly
			Tephritidae	99.99	Tephritinae	99.99	Tephritini	99.99	Neotephritis	99.9	finalis	99.5					Sunflower Seed Fruit Fly
			Tephritidae	99.99	Tephritinae	99.99	Tephritini	99.99	Dioxyna	99.9	picciola	99.5					Fruit Fly
			Tephritidae	99.99	Tephritinae	99.99	Tephritini	99.9	Tephritis	99.5	baccharis	99.5					Mulefat Fruit Fly
			Tephritidae	99.99	Tephritinae	99.99	Terelliini	99.99	Neaspilota	99.99	brunneostigmata	99.5					Fruit Fly
			Therevidae	99.5	Therevinae	95	Cyclotelini	95	Ozodiceromyia	95	cf. signatipennis	85					Stiletto Fly
			Therevidae	99.5	Therevinae	95	Therevini	95	Thereva	90		90					Stiletto Fly
			Therevidae	99.5	Therevinae	95	Therevini	95	Thereva	95	comata	80					Stiletto Fly
			Tipulidae	99.99	Tipulinae	99.99	Tipulini	99.9	Nephrotoma	99.9	suturalis	99.5	wulpiana	99.5			Tiger Crane Fly
			Tipulidae	99.99	Tipulinae	99.9	Tipulini	99.9	Tipula	99.5	oleracea	99.5			A	N	Marsh Crane Fly
			Tipulidae	99.99	Tipulinae	99.9	Tipulini	99.9	Tipula	99.5	planicornis	99.99					Crane Fly
		Order: Embiidina = Webspinners
			Oligotomidae	99.9	n/a	99.5	n/a	99.5	Haploembia	99.5	solieri	99.5			A		Webspinner
		Order: Ephemeroptera = Mayflies
			Baetidae	90	Baetinae	90	Baetini	90	Callibaetis	90	pictus	85					Small Minnow Mayfly
		Order: Hemiptera = True Bugs, Cicadas, Hoppers, Aphids, & kin
			Aleyrodidae	99.99	Aleyrodinae	75	Aleyrodini	75	Aleyrodes	75	spiroeoides	75					Iris Whitefly
			Aleyrodidae	99.99	Aleyrodinae	99.99	Aleyrodini	99.99	Pealius	99.99	kelloggi	99.5					Kellogg's Whitefly
			Alydidae		Alydinae		n/a		Alydus		conspersus						Broad-headed Bug
			Alydidae	99.9	Alydinae	99.9	n/a	99.9	Alydus	99.9	eurinus	99.9					Broad-headed Bug
			Anthocoridae	99.99	Anthocorinae	99.9	Anthocorini	99.5	Anthocoris	99.5	antevolens	85					Minute Pirate Bug
			Anthocoridae	99.99	Anthocorinae	99.9	Oriini	99.9	Orius	99.9	tristicolor	99.5			B		Minute Pirate Bug
			Aphididae	99.99													Bulrush Aphid
			Aphididae	99.99	Aphidinae	65	Macrosiphini	55	Uroleucon	55							Erigeron Aphid
			Aphididae	99.99	Aphidinae	65	Aphidini	60	Aphis	55							Aphid
			Aphididae	99.99	Aphidinae	99.5	Aphidini	99.5	Aphis	99.5	cornifoliae	85					Sunflower Aphid
			Aphididae	99.99	Aphidinae	99	Aphidini	99	Aphis	99	gossypii	99					Cotton Aphid
			Aphididae	99.9	Aphidinae	95	Macrosiphini	90									Aphid
			Aphididae	99.99	Aphidinae	95	Macrosiphini	65									Aphid
			Aphididae	99.9	Aphidinae	98	Macrosiphini	98	Acyrthosiphon	90	pisum	65					Pea Aphid
			Aphididae	99.99	Aphidinae	85	Macrosiphini	85	Sitobion	70							Aphid
			Aphididae	99.99	Aphidinae	70	Macrosiphini	70	Uroleucon	70	cf. lambersius	55				N	Aphid
			Aphididae	99.99	Aphidinae	99.5	Macrosiphini	99.5	Uroleucon	99	sonchellum	85					Aphid
			Aphididae	99.9	Chaitophorinae	99.5	Siphini	99.5	Sipha	99	maydis	99			A		Chaitophorine Aphid
			Aphididae	99.99	Eriosomatinae	60										N	Woolly Aphid
			Aradidae	99.99	Aradinae	95	n/a	95	Aradus	95							Flat Bug
			Berytidae	99.99	Metacanthinae	99.5	Metacanthini	99.5	Jalysus	99.5	wickhami	85					Stilt Bug
			Cercopidae	99.99	Clastopterinae	99.99	Clastopterini	99.99	Clastoptera	99.99	juniperina	99.9					Spittlebug
			Cicadellidae	99.99	Cicadellinae	99.99	Cicadellini	99.99	Draeculacephala	99.99	minerva	99.9					Grass Sharpshooter
			Cicadellidae	99.99	Cicadellinae	99.9	Cicadellini	99.5	Giprus	99.5							Leafhopper
			Cicadellidae	99.9	Deltocephalinae	75										N	Leafhopper
			Cicadellidae	99.5	Deltocephalinae	99.5	Acinopterini	99.5	Acinopterus	99.5	angulatus	99.5				N	Leafhopper
			Cicadellidae	99.99	Deltocephalinae	99.9	Athysanini	99.5	Colladonus	99.5	reductus	99.5					Leafhopper
			Cicadellidae	99.9	Deltocephalinae	99.5	Athysanini	99.5	Texananus	99.5	latipex	90				N	Leafhopper
			Cicadellidae	99.99	Deltocephalinae	99.9	Deltocephalini	99.9	Deltocephalus	99.9	grex	99.5					Leafhopper
			Cicadellidae	99.99	Deltocephalinae	99.5	Deltocephalini	99.5	Polyamia	99.5						N	Leafhopper
			Cicadellidae	99.9	Deltocephalinae	99.5	Macrostelini	99.5	Macrosteles	99.5	quadrilineatus	90					Aster Leafhopper
			Cicadellidae	99.99	Deltocephalinae	99.9	Macrostelini	99.9	Macrosteles	99.9	cf. severini	95					Leafhopper
			Cicadellidae	99.99	Deltocephalinae	99.9	Pendarini	99.5	Paraphlepsius	99.5							Leafhopper
			Cicadellidae	99.99	Deltocephalinae	99.9	Scaphoideini	99.9	Osbornellus	99.5	nr. borealis	85					Ladder Leafhopper
			Cicadellidae	99.99	Deltocephalinae	99.9	Scaphytopiini	99.9	Scaphytopius	99.5	irroratus	85					Leafhopper
			Cicadellidae	99.99	Idiocerinae	85	Idiocerini	70	Idiocerus	70	nr. pallidus	70					Leafhopper
			Cicadellidae	99.5	Ledrinae	95	Xerophloeini	90	Xerophloea	90							Leafhopper
			Cicadellidae	99.9	Megophthalminae	99.9	Agalliini	99.5	Ceretagallia	99.5						N	Leafhopper
			Cicadellidae	99.9	Typhlocybinae	99.5	Dikraneurini	99.5	Alconeura	99.5	quadrimaculata	99.5					Sycamore Leafhopper
			Cicadellidae	99.5	Typhlocybinae	70	Dikraneurini	70	Dikraneura	70						N	Leafhopper
			Cicadellidae	99.5	Typhlocybinae	85	Empoascini	85	Empoasca	85	fabae	60				N	Potato Leafhopper
			Cicadellidae	99.99	Typhlocybinae	99.5	Empoascini	99.5	Empoasca	99.5	elongella	98					Leafhopper
			Coreidae	99.9	Coreinae	99.5	n/a	99.5	Leptoglossus	99	clypealis	90					Western Leaf-footed Bug
			Corixidae	99.9	Corixinae	99.9	n/a	99.9	Corisella	99.5	decolor	99.5					Water Boatman
			Delphacidae	99.5	Delphacinae	99.5	Delphacini	99.5	Delphacodes	99.5	nr. puella	95					Planthopper
			Delphacidae	99.5	Delphacinae	85	Delphacini	85	Javesella	85						N	Planthopper
			Delphacidae	99.9	Delphacinae	99.9	Delphacini	99.9	Stobaera	99.9	concinna	98					Planthopper
			Geocoridae	99	Geocorinae	99	n/a	99	Geocoris	55	uliginosus	55					Big-eyed Bug
			Geocoridae	99.5	Geocorinae	99.5	n/a	99.5	Isthmocoris	60	imperialis	60					Big-eyed Bug
			Gerridae	99.5	Gerrinae	85	Gerrini	85	Gerris	85							Water Strider
			Lygaeidae	99.95	Lygaeinae	99.5	n/a	99.5	Melanopleurus	99.5	belfragei	99.5					Seed Bug
			Lygaeidae	99.9	Orsillinae	99.9	Nysiini	99.9	Nysius	99.9	raphanus	90					False Chinch Bug
			Membracidae	99.9	Smiliinae	99.5	Smiliini	99.5	Telamona	99.5							Treehopper
			Miridae	99.9	Bryocorinae	99.5	Dicyphini	99.9	Tupiocoris	99.9	californicus	99.5					Plant Bug
			Miridae	99.9	Mirinae	99.9	Mirini	99.9	Closterotomus	99.5	norvegicus	99.5			A		Potato Bug
			Miridae	99.9	Mirinae	99.9	Mirini	99.9	Lygus	99.9							Lygus Plant Bug
			Miridae	99.9	Mirinae	99.9	Mirini	99.9	Lygus	99.9	elisus	95					Lygus Plant Bug
			Miridae	99.99	Mirinae	99.5	Mirini	99.5	Taylorilygus	99.5	apicalis	99.5			A		Brokenbacked Bug
			Miridae	99.9	Philinae	85	Philini	85								N	Plant Bug
			Miridae	99.9	Philinae	99.9	Philini	99.9	Spanagonicus	99.5	albofasciatus	99.5					Plant Bug
			Nabidae	99.99	Nabinae	99.95	Nabini	99.95	Nabis	99.95	alternatus	99					Western Damsel Bug
			Pentatomidae	99.99	Pentatominae	99.95	Antestiini	99.5	Thyanta	99.5	pallidovirens	99.5	spinosa	95			Redshouldered Stink Bug
			Pentatomidae	99.9	Pentatominae	99.9	Pentatomini	99.9	Chlorochroa	99.9	sayi	99.9					Say's Stink Bug
			Pentatomidae	99.99	Pentatominae	99.99	Pentatomini	99.99	Murgantia	99.99	histrionica	99.99			A		Harlequin Bug
			Pentatomidae	99.9	Pentatominae	99.9	Strachiini	99.9	Bagrada	99.9	hilaris	99.5			A		Bagrada Bug
			Psyllidae	99													Psyllid
			Psyllidae	90													Psyllid
			Psyllidae	99.5													Psyllid
			Psyllidae	99.9	Spondyliaspidinae	99.5	Spondyliaspidini	99.5	Glycaspis	99.5	brimblecombei	99.5			A		Red Gum Lerp Psyllid
			Reduviidae	99.99	Harpactorinae	99.9	n/a	99.9	Rhynocoris	99.9	ventralis	99.5	var. femoralis	99.5			Assassin Bug
			Reduviidae	99.99	Harpactorinae	99.9	n/a	99.9	Sinea	99.9	diadema	95					Spined Assassin Bug
			Reduviidae	99.99	Harpactorinae	99.5	n/a	99.5	Zelus	99.5	tetracanthus	99.9					Assassin Bug
			Rhopalidae	99.99	Rhopalinae	99.9	Harmostini	99.9	Harmostes	99.9	reflexulus	99.5					Scentless Plant Bug
			Rhopalidae	99.5	Rhopalinae	99.5	Niesthrini	99.5	Arhyssus	99.5							Scentless Plant Bug
			Rhopalidae	99.5	Rhopalinae	99.5	Rhopalini	99.5	Liorhyssus	99.5	hyalinus	99.5				N	Hyaline Grass Bug
			Rhopalidae	99.9	Rhopalinae	99.5	Rhopalini	99.5	Stictopleurus	99.5	punctiventris	85					Scentless Plant Bug
			Rhyparochromidae	99.99	Rhyparochrominae	99.99	Megalonotini	99.99	Megalonotus	99.99	sabulicola	99.5			A		Dirt-colored Seed Bug
			Rhyparochromidae	99.99	Rhyparochrominae	99.99	Rhyparochromini	99.99	Xanthochilus	99.99	saturnius	99.99			A		Mediterranean Seed Bug
			Saldidae	99.99	Saldinae	99.5	Saldoidini	99.5	Saldula	99.5							Shore Bug
			Tingidae	99.99	Tinginae	99.99	Tingini	99.5	Corythucha	99.5	marmorata	99.5					Lace Bug
			Triozidae	99.5	Triozinae	85	Triozini	85	Trioza	85						N	Triozid Jumping Plant Louse
			Triozidae	99.5	Triozinae	99	Triozini	99	Trioza	98							Triozid Jumping Plant Louse
		Order: Hymenoptera = Wasps, Ants, Bees, Sawflies, & kin
			Andrenidae	99.99	Panurginae	99.99	Calliopsini	99.99	Calliopsis	99.99	Nomadopsis s.l.	99.99					Mining Bee
			Anthophoridae	99.99	Xylocopinae	99.99	Xylocopini	99.99	Xylocopa	99.99	varipuncta	99.5					Valley Carpenter Bee
			Apidae	99	Apinae	99	Anthophorini	75	Anthophora	75	californica	60					Anthophorine Bee
			Apidae	99.9	Apinae	99.5	Anthophorini	99.5	Anthophora	99.5	squammulosa	80					Anthophorine Bee
			Apidae	99.99	Apinae	99.99	Apini	99.99	Apis	99.99	mellifera	99.9			A		European Honey Bee
			Apidae	99.99	Apinae	99.99	Emphorini	99.99	Diadasia	99.99	enavata	99.99					Digger Bee
			Apidae	99.9	Apinae	99.5	Eucerini	99.5	Eumelissodes	85							Long-horned Bee
			Apidae	99.9	Apinae	99.9	Eucerini	99.5	Melissodes	60							Long-horned Bee
			Apidae	99.5	Apinae	99.5	Eucerini	99.5	Melissodes	85							Long-horned Bee
			Apidae	99	Apinae	85	Eucerini	75	Melissodes	75	pallidisignata	65					Long-horned Bee
			Apidae	99.99	Bombinae	99.99	Bombini	99.99	Bombus	99.9	sonorus	99.9					Sonoran Bumble Bee
			Apidae	99.99	Bombinae	99.99	Bombini	99.99	Bombus	99.9	vosnesenskii	99.5					Vosnesenski's Bumble Bee
			Apidae	99.99	Nomadinae	99.99	Epeolini	99.99	Epeolus	99.99							Cuckoo Bee
			Apidae	99.99	Nomadinae	99.99	Epeolini	99.99	Triepeolus	99.99	helianthi	75					Cuckoo Bee
			Braconidae	85													Braconid Wasp
			Braconidae	99.5													Braconid Wasp
			Braconidae	99.5													Braconid Wasp
			Braconidae	99.5													Braconid Wasp
			Braconidae	99	Agathidinae	85											Braconid Wasp
			Braconidae	99.9	Agathidinae	99.9	Agathidini	95	Bassus	95							Braconid Wasp
			Braconidae	95	Aphidiinae	90	Aphiidini	55	Diaeretiella	55							Braconid Wasp
			Braconidae	99.5	Meteorinae	75	Meteorini	75	Meteorus	75							Braconid Wasp
			Braconidae	99	Microgastrinae	65											Braconid Wasp
			Braconidae	99.5	Microgastrinae	65	Cotesini	65	Cotesia	65						N	Braconid Wasp
			Braconidae	99.5	Opiinae	80											Braconid Wasp
			Bradynobaenidae	99.5	Typhoctinae	99.5	Typhoctini	99.5	Typhoctes	99.5	peculiaris	99.5	peculiaris	99.5			Bradynobaenid Wasp
			Colletidae	95	Colletinae	90	Colletini	90	Colletes	90							Cellophane Bee
			Crabronidae	99.9	Astatinae	99	Astatini	99	Astata	99							Square-headed Wasp
			Crabronidae	99.9	Crabroninae	99.5	Crabronini	99	Ectemnius	85							Square-headed Wasp
			Crabronidae	99.5	Crabroninae	99.5	Larrini	99.8	Liris	99.5	argentatus	85					Square-headed Wasp
			Crabronidae	99.5	Crabroninae	99.5	Larrini	98.5	Tachysphex	55							Square-headed Wasp
			Crabronidae	99.5	Crabroninae	99.5	Larrini	98.5	Tachysphex	90							Square-headed Wasp
			Crabronidae	99.5	Crabroninae	99.5	Larrini	99.5	Tachysphex	99	terminatus-group	80					Square-headed Wasp
			Crabronidae	99.5	Pemphredoninae	99	Pemphredonini	99	Diodontus	98							Aphid Wasp
			Crabronidae	99.9	Pemphredoninae	99.5	Pemphredonini	99.5	Pemphredon	98							Aphid Wasp
			Crabronidae	99.99	Philanthinae	99.99	Philanthini	99.9	Philanthus	99.9	multimaculatus	99.9					Beewolf
			Cynipidae	85													Gall Wasp
			Cynipidae	99.9	Cynipinae	99.9	Cynipini	99.5	Andricus	99	quercussuttoni	85					Gouty Stem Gall Wasp
			Cynipidae	99.9	Cynipinae	99.9	Cynipini	99.5	Dryocosmus	99.5	minusculus	99.5					Pumpkin Gall Wasp
			Diapriidae	99.5	Diapriinae	99.5	Diapriini	99	Trichopria	99							Diapriid Wasp
			Encyrtidae	99.5													Ant-mimic Parasitoid Wasp
			Encyrtidae	99.5	Encyrtinae	99.5	Trechnitini	99.5	Psyllaephagus	99.5	bliteus	99.5			B	N	Red Gum Lerp Psyllid Wasp
			Eulophidae	99.5	Eulophinae	65											Eulophid Wasp
			Eurytomidae	99.5													Seed Chalcid Wasp
			Figitidae	99.99	Eucoilinae	99.9											Figitid Wasp
			Formicidae	99.99	Dolichoderinae	99.99	Tapinomini	99.99	Linepithema	99.99	humilis	99.99			A		Argentine Ant
			Formicidae	99.9	Myrmicinae	99.9	Formicoxenini	99.9	Cardiocondyla	99.9	mauritanica	99.5	(ectopia)	99.5	A		Ant
			Formicidae	99.9	Myrmicinae	99.9	Myrmicini	99.9	Pogonomyrmex	99.9	anzensis	95					California Harvester Ant
			Halictidae	99.9	Halictinae	99.5	Augochlorini	85	Augochlorella	85	pomoniella	85					Metallic Sweat Bee
			Halictidae	99.5	Halictinae	99.5	Halictini	60									Metallic Sweat Bee
			Halictidae	99.9	Halictinae	99.5	Halictini	99.5	Agapostemon	80	virescens	75					Metallic Sweat Bee
			Halictidae	99.5	Halictinae	95	Halictini	95	Halictus	60							Sweat Bee
			Halictidae	99.5	Halictinae	99.5	Halictini	99.5	Halictus	99.5	rubicundus	90					Sweat Bee
			Halictidae	99.5	Halictinae	80	Halictini	70	Lasioglossum	60							Sweat Bee
			Halictidae	99.5	Halictinae	99.5	Halictini	99.5	Lasioglossum	99.5	actinosum	85					Sweat Bee
			Halictidae	99.5	Halictinae	99.5	Halictini	99.5	Lasioglossum	99.5	incompletum	60					Sweat Bee
			Ichneumonidae	75													Ichneumonoid Wasp
			Ichneumonidae	99.99	Anomaloninae	99.5	Anomalonini	99.5	Anomalon	99.5							Ichneumon Wasp
			Ichneumonidae	99	Campopleginae	85											Ichneumon Wasp
			Ichneumonidae	99.5	Campopleginae	99	Lathrostizus	65									Ichneumon Wasp
			Ichneumonidae	99.5	Cremastinae	90	Cremastini	75	Temelucha	75	cf. grapholithae	65					Ichneumon Wasp
			Ichneumonidae	99.9	Cryptinae	95	Cryptini	85	Idiolispa	85	analis	85	ignea	85			Ichneumon Wasp
			Ichneumonidae	99.5	Ichneumoninae	70											Ichneumon Wasp
			Ichneumonidae	99	Mesochorinae	60	Mesochorini	55	Mesochorus	55						N	Ichneumon Wasp
			Ichneumonidae	99.9	Ophioninae	99.99	Ophionini	99.9	Enicospilus	99.5	merdarius	99.5				N	Inchneumon Wasp
			Ichneumonidae	99.9	Ophioninae	99	Ophionini	99	Ophion	98						N	Short-Tailed Inchneumon Wasp
			Ichneumonidae	99.9	Pimplinae	98	Pimplini	95	Pimpla	95							Ichneumon Wasp
			Ichneumonidae	99.5	Pimplinae	99	Pimplini	99	Pimpla	99							Ichneumon Wasp
			Ichneumonidae	99.5	Triphoninae	99	Phytodietini	99	Netelia	65							Ichneumon Wasp
			Megachillidae	99.5	Megachillinae	85											Leafcutter Bee
			Megaspilidae	99.5													Megaspilid Wasp
			Mutillidae	99.99	Sphaeropthalminae	99.99	Pseudomethocini	99.99	Pseudomethoca	99.99	anthracina	99.99					Velvet Ant
			Mutillidae	99.99	Sphaeropthalminae	99.99	Pseudomethocini	95	Pseudomethoca	95	anthracina	95					Velvet Ant
			Mutillidae	99.99	Sphaeropthalminae	99.5	Dasymutillini	99.5	Dasymutilla	99.5							Red-haired Velvet Ant
			Perilampidae	99.5	Perilampinae	85	Perilampini	85	Perilampus	85	hyalinus	65					Perilampid Wasp
			Platygastridae	99.5	Platygastrinae	95	Platygastrini	85	Synopeas	85							Platygastrid Wasp
			Pompilidae	99.5	Pepsinae	99.5	Ageniellini	99.5	Ageniella	99.5	coronata	99.5					Spider Wasp
			Pteromalidae	85													Pteromalid Wasp
			Pteromalidae	65													Pteromalid Wasp
			Pteromalidae	90													Pteromalid Wasp
			Pteromalidae	85													Pteromalid Wasp
			Scoliidae	99.9	Campsomerinae	99.5	Campsomerini	99.5	Campsomeris	99.5	pilipes	85					Yellow Scarab Hunter
			Pompilidae	99.9	Pepsinae	99.5	Pepsini	99.5	Pepsis	99.5	thisbe	99					Tarantula Hawk
			Pompilidae	99.5	Pompilinae	99.5	Pompilini	99.5	Episyron	99.5	conterminus	99.5	posterus	99.5			Spider Wasp
			Pompilidae	99.99	Pompilinae	99.9	Pompilini	99.9	Perissopompilus	99.9	phoenix	99.9					Spider Wasp
			Sphecidae	99.99	Ammophilinae	99.9	Ammophilini	99.9	Ammophila	99.9	nigricans	85					Thread-waisted Digger Wasp
			Sphecidae	99	Ammophilinae	99	Ammophilini	99	Podalonia	99	luctuosa	85					Cutworm Wasp
			Sphecidae	99.5	Sphecinae	99	Sceliphrini	99	Chalybion	99	californicum	98					Blue Mud Wasp
			Sphecidae	99.5	Sphecinae	99	Sceliphrini	99	Chalybion	99	californicum	95					Blue Mud Wasp
			Sphecidae	99.9	Sphecinae	99.9	Sceliphrini	99.9	Sceliphron	99.9	caementarium	99.5					Black and Yellow Mud Dauber
			Sphecidae	99.99	Sphecinae	99.99	Sphecini	99.99	Prionyx	99.99	thomae	85					Thread-waisted Wasp
			Sphecidae	99.5	Sphecinae	99.5	Sphecini	99.5	Sphex	99.5	ichneumoneus	99.5					Great Golden Digger Wasp
			Tenthredinidae	99.5	Selandriinae	98.9	Nematini	99	Euura	98							Euurina Willow Gall Sawfly
			Tenthredinidae	99.9	Selandriinae	99.9	Nematini	99.9	Pontania	99.9	pacifica	99.5					Willow Apple Gall Sawfly
			Vespidae	99.9	Eumeninae	99.9	Alticini	99.9	Ancistrocerus	98	albophaleratus	80					Mason Wasp
			Vespidae	99	Eumeninae	99	Alticini	99	Ancistrocerus	99	cf. spilopterus	99					Mason Wasp
			Vespidae	99.99	Eumeninae	99.5	Eumenini	99.5	Eumenes	99.5	crucifera	95	crucifera	65			Potter Wasp
			Vespidae	99.9	Eumeninae	99.5	Eumenini	99.5	Stenodynerus	99.5							Mason Wasp
			Vespidae	99.9	Eumeninae	99.9	Eumenini	99.5	Euodynerus	99.5	hidalgo	99.5	hidalgo	99.5			Mason Wasp
			Vespidae	99.99	Polistinae	99.99	Polistini	99.99	Polistes	99.99	apachus	99.5					Paper Wasp
			Vespidae	99.99	Polistinae	99.9	Polistini	99.9	Polistes	99.5	dominula	99.5			A		European Paper Wasp
		Order: Isoptera = Termites
			Kalotermitidae	99.5	Incisitermitinae	99.5	Incisitermitini	99.5	Incisitermes	99.5	minor	99.5					Western Drywood Termite
		Order: Lepidoptera = Butterflies & Moths
			Coleophoridae	99.9	Coleophorinae	99.5	Coleophorini	99.5	Coleophora	99.5	accordella	85				N	Casebearer Moth
			Coleophoridae	99.5	Coleophorinae	95	Coleophorini	95	Coleophora	95	atriplicivora	75				N	Casebearer Moth
			Crambidae	99.9	Crambinae	99.9	Crambini	99.9	Crambus	99.9	leachellus	99.5					Leach's Grass-veneer
			Crambidae	99.99	Crambinae	99.99	Crambini	99.99	Euchromius	99.99	ocelleus	99.5			A		Necklace Veneer
			Crambidae	99.5	Evergestinae	95	Evergestini	95	Evergestis	95	rimosalis	65				N	Snout Moth
			Crambidae	99.9	Glaphyriinae	99.5	n/a	99.5	Dicymolomia	99.5	metalliferalis	99.5				N	Lupine Snout Moth
			Crambidae	99.5	Glaphyriinae	80	n/a	80	Stegea	65						N	Snout Moth
			Crambidae	99.5	Glaphyriinae	99.5	n/a	99.5	Stegea	99.5	salutalis	99	riparialis	99		N	Snout Moth
			Crambidae	99.9	Nymphulinae	99.9	Nymphulini	99.9	Hellula	99.9	rogatalis	99.9					Cabbage Webworm Moth
			Crambidae	99.99	Pyraustinae	99.99	Pyraustini	99.95	Uresiphita	99.95	reversalis	99.95					Genista Moth
			Crambidae	99.99	Pyraustinae	99.99	Spilomelini	99.99	Lygropia	99.99	octonalis	99.9					Eight-barred Lygropia
			Crambidae	99.99	Pyraustinae	99.95	Spilomelini	99.95	Nomophila	99.95	nearctica	99.9					Lucerne Moth
			Crambidae	99.99	Pyraustinae	99.9	Spilomelini	99.9	Glyphodes	99.9	onychinalis	99.9			A		Crambid Moth
			Elachistidae	99.5	Elachistinae	99.5	Elachistini	99.5	Elachista	99.5							Grass Miner Moth
			Erebidae	99.9	Arctiinae	99.9	Arctiini	99.9	Estigmene	99.5	acrea	99.5	acrea	99.5			Salt Marsh Moth
			Erebidae	99.99	Erebinae	99.9	Catocalini	99.9	Catocala	99.5	californica	99.5					Underwing Moth
			Erebidae	99.99	Erebinae	99.9	Catocalini	99.9	Catocala	99.5	faustina	98	cleopatra	95			Underwing Moth
			Erebidae	99.5	Erebinae	99.5	Euclidiini	99.5	Caenurgia	99.9	togataria	99.9					Looper Moth
			Erebidae	99.9	Herminiinae	99.9	n/a	99.9	Tetanolita	99.5	palligera	99.5				N	Litter Moth
			Gelechiidae	99.9	Gelechiinae	99.5	Gelechiini	99.5	Aristotelia	99.5	adenostomae	95					Gelechiid Moth
			Gelechiidae	99.8	Gelechiinae	99.5	Gelechiini	99.5	Aroga	99.5	unifasciella	99.5				N	Twirler Moth
			Gelechiidae	99.5	Gelechiinae	99.5	Gelechiini	99.5	Chionodes	99.5	popa	85				N	Twirler Moth
			Geometridae	99.5	Ennominae	99.5	Ourapterygini	99.5	Prochoerodes	99.5	forficaria	99.5	forficaria	65			Geometer Moth
			Geometridae	99.5	Ennominae	99.5	Semiothisini	99.5	Digrammia	99.5	californiaria	99					Geometer Moth
			Geometridae	99.5	Ennominae	99.5	Semiothisini	99.5	Digrammia	99.5	irrorata	99.5					Angle Moth
			Geometridae	99.9	Larentiinae	99.5	Eupitheciini	99.5	Eupithecia	99.5	miserulata	98					Common Eupithecia Moth
			Geometridae	99.9	Sterrhinae	99.5	Cosymbiini	99.5	Cyclophora	99.5	nanaria	99.5				N	Dwarf Tawny Wave Moth
			Heliozelidae	99.5	Heliozelinae	99.5	Heliozelini	99.5	Coptodisca	99.5	powellella	99					Shield-Bearer Moth
			Hesperiidae	99.99	Hesperiinae	99.99	Hesperiini	99.99	Hylephila	99.99	phyleus	99.9					Fiery Skipper
			Hesperiidae	99.99	Hesperiinae	99.99	Hesperiini	99.99	Poanes	99.99	melane	99.9					Umber Skipper
			Hesperiidae	99.99	Hesperiinae	99.99	Hesperiini	99.99	Polites	99.99	sabuleti	99.5					Sandhill Skipper
			Hesperiidae	99.99	Hesperiinae	99.99	Moncini	99.99	Lerodea	99.9	eufala	99.9					Eufala Skipper
			Hesperiidae	99.99	Pyrginae	99.99	Erynnini	99.99	Erynnis	99.9	funeralis	95					Funereal Duskywing
			Hesperiidae	99.99	Pyrginae	99.99	Pyrgini	99.99	Heliopetes	99.9	ericetorum	99.5					Northern White-skipper
			Hesperiidae	99.99	Pyrginae	99.99	Pyrgini	99.99	Pyrgus	99.99	albescens	98					White Checkered-skipper
			Lycaenidae	99.99	Polyommatinae	99.99	Lampidini	99.99	Leptotes	99.99	marina	99.99					Marine Blue
			Lycaenidae	99.99	Polyommatinae	99.99	Polyommatini	99.99	Brephidium	99.5	exile	99.5					Western Pygmy-blue
			Lycaenidae	99.99	Polyommatinae	99.99	Polyommatini	99.99	Echinargus	99.5	isola	99.5					Reakirt's Blue
			Lycaenidae	99.99	Polyommatinae	99.99	Polyommatini	99.99	Everes	99.5	amyntula	99.5					Western Tailed-blue
			Lycaenidae	99.99	Polyommatinae	99.99	Polyommatini	99.99	Plebejus	99.9	acmon	99.9					Acmon Blue
			Lycaenidae	99.99	Theclinae	99.99	Eumaeini	99.99	Strymon	99.99	melinus	99.99					Gray Hairstreak
			Noctuidae	99.5	Heliothinae	99.5	n/a	99.5	Helicoverpa	99.5	zea	99.5					Corn Earworm Moth
			Noctuidae	99.5	Heliothinae	99.5	n/a	99.5	Schinia	99.9	pulchripennis	99.5					Flower Moth
			Noctuidae	99.9	Noctuinae	99.5	Eriopygini	99.5	Lacinipolia	99.5	circumcincta	99.5				N	Dart Moth
			Noctuidae	99.9	Noctuinae	99.5	Eriopygini	80	Protorthodes	80	rufula	80				N	Quaker Moth
			Noctuidae	99.9	Noctuinae	99.5	Leucaniini	99	Mythimna	98	unipuncta	98				N	Armyworm Moth
			Noctuidae	99.99	Noctuinae	99.5	Noctuini	99.5	Abagrotis	99	forbesi	85				N	Cutworm Moth
			Noctuidae	99.99	Noctuinae	99.9	Prodeniini	99.9	Spodoptera	99.9	exigua	99.9				N	Small Mottled Willow Moth
			Noctuidae	99.9	Noctuinae	99.5	Prodeniini	99.5	Spodoptera	99.5	ornithogalli	99.5			E		Yellow-striped Armyworm Moth
			Noctuidae	99.9	Plusiinae	99.5	Plusiini	99.5	Autographa	99.5	californica	99.5					Alfalfa Looper
			Noctuidae	99.99	Plusiinae	99.99	Plusiini	99.99	Megalographa	99.99	biloba	99.99					Bilobed Looper
			Nymphalidae	99.99	Danainae	99.99	Danaini	99.99	Danaus	99.99	gilippus	99.99					Queen
			Nymphalidae	99.99	Danainae	99.99	Danaini	99.99	Danaus	99.99	plexippus	99.99					Monarch
			Nymphalidae	99.9	Heliconiinae	99.9	Heliconiini	99.9	Agraulis	99.9	vanillae	99.9			E		Gulf Fritillary
			Nymphalidae	99.99	Nymphalinae	99.99	Nymphalini	99.99	Nymphalis	99.99	antiopa	99.99					Mourning Cloak
			Nymphalidae	99.99	Nymphalinae	99.99	Nymphalini	99.99	Vanessa	99.99	annabella	99.99					West Coast Lady
			Nymphalidae	99.99	Nymphalinae	99.99	Nymphalini	99.99	Vanessa	99.99	atalanta	99.99					Red Admiral
			Nymphalidae	99.99	Nymphalinae	99.99	Nymphalini	99.99	Vanessa	99.99	cardui	99.99					Painted Lady
			Nymphalidae	99.99	Nymphalinae	99.99	Nymphalini	99.99	Vanessa	99.99	virginiensis	99.9					American Lady
			Papilionidae	99.99	Papilioninae	99.99	Papilionini	99.99	Papilio	99.99	rutulus	99.9					Western Tiger Swallowtail
			Papilionidae	99.99	Papilioninae	99.99	Papilionini	99.99	Papilio	99.99	zelicaon	99.9					Anise Swallowtail
			Pieridae	99.99	Coliadinae	99.99	Coliadini	99.99	Nathalis	99.99	iole	99.99					Dainty Sulphur
			Pieridae	99.99	Coliadinae	99.99	Coliadini	99.99	Colias	99.99	eurytheme	99.5					Orange Sulphur
			Pieridae	99.99	Pierinae	99.99	Pierini	99.99	Pieris	99.99	rapae	99.99			A		Cabbage White
			Plutellidae	99.5	Plutellinae	99.5	Plutellini	99.5	Plutella	99.5	dammersi	60				N	Diamondback Moth
			Plutellidae	99.5	Plutellinae	99.5	Plutellini	99.5	Plutella	99.5	xylostella	99.5			A		Diamondback Moth
			Pterophoridae	99.99	Pterophorinae	99.9	Pterophorini	85	Adaina	70	ambrosiae	70					Ambrosia Plume Moth
			Pyralidae	99.99	Phycitinae	99.99	Phycitini	99.99	Elasmopalpus	99.9	lignosellus	99.5					Lesser Cornstalk Borer
			Pyralidae	99.9	Phycitinae	99.5	Phycitini	99.5	Ephestiodes	99.9	gilvescentella	99.9					Pyralid Moth
			Pyralidae	99	Phycitinae	75	Phycitini	75	Homoeosoma	75	electella	75				N	Pyralid Moth
			Sesiidae	99.99	Tinthiinae	99.9	Paranthrenini	99.9	Paranthrene	99.9	robiniae	99.5	palescens	99.5			Western Poplar Clearwing
			Sphingidae	99.9	Macroglossinae	99.9	Macroglossini	99.9	Hyles	99.9	lineata	99.9				N	White-lined Sphinx
			Tineidae	99.9	Acrolophinae	99.99	n/a	99.99	Ptilopsaltis	95	confusella	95				N	Burrowing Webworm Moth
			Tineidae	99.9	Erechthiinae	99.9	Erechthiini	99.9	Erechthias	99.9	minuscula	99.5					Caribbean Scavenger Moth
			Tortricidae	99.9	Olethreutinae	99.5	Eucosmini	99.5	Epiblema	99.5	nr strenuana	99.5				N	Ragweed Borer
			Tortricidae	99.9	Olethreutinae	99.5	Eucosmini	99.5	Epinotia	99.9	subviridis	99.5				N	Tortricid Moth
			Tortricidae	99.99	Olethreutinae	99.9	Eucosmini	99.9	Eucosma	99.5	atomosana	98				N	Tortricid Moth
			Tortricidae	99.99	Olethreutinae	99.9	Eucosmini	99.9	Gypsonoma	99.5	aceriana	99.5			A		European Poplar Shoot Borer
			Tortricidae	99.5	Olethreutinae	95	Eucosmini	95	Notocelia	75	illotana	75					Torticid Moth
			Tortricidae	99.9	Olethreutinae	99.9	Eucosmini	99.5	Suleima	99.5	helianthana	99.5					Sunflower Bud Moth
			Tortricidae	99.5	Olethreutinae	99.5	Eucosmini	99.5	Suleima	99.5	lagopana	99.5				N	Tortricid Moth
			Tortricidae	99.9	Tortricinae	99.5	Archipini	99.5	Clepsis	99.5	peritana	99.5				N	Garden Tortrix
			Tortricidae	99.5	Tortricinae	99	Cochylini	99	Platphalonidia	95	felix	95				N	Tortricid Moth
			Tortricidae	99.99	Tortricinae	99.5	Sparganothidini	99.5	Platynota	99.5	sultana	99.5				N	Omnivorous Leafroller
		Order: Microcoryphia = Bristletails
			Meinertellidae	99.5	Meinertellinae	99.5	n/a	99.5	Machilinus	99.5	aurantiacus	99.5					Rock Bristletail
		Order: Neuroptera = Lacewings, Antlions, & kin
			Chrysopidae	99.99	Chrysopinae	99.9	n/a	99.9	Chrysoperla	99.5	adamsi	55					Common Green Lacewing
			Hemerobiidae	99.9	Hemerobiinae	95	n/a	95	Wesmaelius	85						N	Brown Lacewing
			Myrmeleontidae	99.5	Myrmeleontinae	99.5	Myrmeleontini	99.5	Myrmeleon	99.5							Antlion
		Order: Odonata = Dragonflies & Damselflies
			Aeshnidae	99.99	Aeshninae	99.99	Anactini	99.99	Anax	99.99	junius	99.9					Green Darner
			Aeshnidae	99.99	Aeshninae	99.9	Aeschnini	99.9	Rhionaeschna	99.9	multicolor	99.5					Blue-Eyed Darner
			Libellulidae	99.99	Libellulinae	99.9	Libellulini	99.9	Libellula	99.99	saturata	99.99					Flame Skimmer
			Libellulidae	99.5	Palpopleurinae	99.5	Palpopleurini	99.5	Perithemis	99.5	intensa	99.5					Mexican Amberwing
			Libellulidae	99.99	Sympetrinae	99.9	Sympetrini	99.9	Pachydiplax	99.9	longipennis	99.9					Blue Dasher
			Libellulidae	99.99	Sympetrinae	99.9	Sympetrini	99.9	Sympetrum	99.99	corruptum	99.9					Variegated Meadowhawk
			Libellulidae	99.5	Trameinae	99.5	Trameini	99.5	Pantala	99.5	flavescens	99.5					Wandering Glider
			Libellulidae	99.5	Trameinae	99.5	Trameini	99.5	Pantala	99.5	hymenaea	99.5					Spot-winged Glider
			Libellulidae	99.5	Trameinae	99.5	Trameini	99.5	Tramea	99.5	onusta	99.5					Red Saddlebag
			Coenagrionidae	99.99	Ischnurinae	99.99	n/a	99.99	Enallagma	99.99	carunculatum	99.5					Tule Bluet
			Coenagrionidae	99.99	Ischnurinae	99.99	n/a	99.99	Enallagma	99.99	civile	99.5					Familiar Bluet
			Coenagrionidae	99.99	Ischnurinae	99.99	n/a	99.99	Enallagma	99.99	cyathigerum	65					Northern Bluet
			Coenagrionidae	99.99	Ischnurinae	99.99	n/a	99.99	Ischnura	99.99	cervula	99.9					Pacific Forktail
			Coenagrionidae	99.99	Ischnurinae	99.99	n/a	99.99	Ischnura	99.99	denticollis	99.9					Black-fronted Forktail
			Coenagrionidae	99.99	Ischnurinae	99.99	n/a	99.99	Ischnura	99.99	perparva	85					Western Forktail
		Order: Orthoptera = Grasshoppers, Crickets, Katydids, & kin
			Acrididae	99.99	Cyrtacanthacridinae	99.5	Melanoplini	100	Melanoplus	99.5	sanguinipes	99.5					Migratory Grasshopper
			Acrididae	99.99	Cyrtacanthacridinae	99.5	Cyrtacanthacridini	99.5	Schistocerca	99.5	nitens	99.5	nitens	99.5			Gray Bird Grasshopper
			Acrididae	99.99	Gomphocerinae	99.5	Aulocarini	99.5	Eupnigodes	99	sierranus	99					Sierran White-whiskered Grasshopper
			Acrididae	99.99	Gomphocerinae	99.5	Aulocarini	99.5	Psoloessa	99.5	texana	99.5					Texas Spotted Range Grasshopper
			Acrididae	99.99	Oedipodinae	99.5	Chortophagini	99.5	Chimarocephala	99.9	pacifica	99.5	incisa	99.5			Painted Meadow Grasshopper
			Acrididae	99.99	Oedipodinae	99.5	Trimerotropini	99.5	Conozoa	99.5	sulcifrons	99.5	sulcifrons	99.5			Groove-headed Grasshopper
			Acrididae	99.9	Oedipodinae	99.5	Trimerotropini	99.5	Dissosteira	99.5	carolina	99.5					Carolina Grasshopper
			Gryllidae	99.99	Gryllinae	99.9	Gryllini	99.9	Gryllus	99.9	assimilis	85					Jamaican Field Cricket
			Myrmecophilidae	99.99	Myrmecophilinae	99.99	Myrmecophilini	99.99	Myrmecophilus	99.9	oregonensis	95					Ant-loving Cricket
			Rhaphidophoridae	99.99	Ceuthophilinae	99.5	Ceuthophilini	99.5	Ceuthophilus	99.5	hesperus	85				N	Camel Cricket
			Tettigoniidae	100	Phaneropterinae	99.5	Phaneropterini	99.5	Scudderia	99.5	mexicana	98					Fork-tailed Bush Katydid
		Order: Psocoptera = Booklice & Barklice
			Elipsocidae	99.99	Propsocinae	99.99	n/a	99.99	Propsocus	99.99	pulchripennis	99.99					Damp Barklouse
			Ectopsocidae	99.9	Ectopsocinae	99.5	n/a	99.5	Ectopsocus	99.5	briggsi	85				N	Outer Barklouse
			Ectopsocidae	99.9	Ectopsocinae	99.9	n/a	99.9	Ectopsocus	99.9	strauchi	99.5			A		Outer Barklouse
			Ectopsocidae	99.5	Ectopsocinae	99.5	n/a	99.5	Ectopsocus	99.5	vachoni	99					Outer Barklouse
			Lachesillidae	70	Lachesillinae	70	Lachesillini	70	Lachesilla	70						N	Fateful Barklice
			Myopsocidae	99.99	Myopsocinae	99.5	Myopsocini	99.5	Myopsocus	99.99						N	Mouse-like Barklouse
			Psocidae	99.9	Amphigerontiinae	99.5	n/a	99.5	Blastopsocus	99							Common Barklouse
		Order: Thysanoptera = Thrips
			Aeolothripidae	99.5	Aeolothripinae	85	Aeolothripini	85	Aeolothrips	85							Predatory Thrips
			Thripidae	99.5	Thripinae	65	Thripini	65	Thrips	65							Common Thrips
			Phlaeothripidae	99.5													Tube-tailed Thrips
		Order: Zygentoma = Silverfish
			Lepismatidae	99.5	Lepismatinae	99.5	n/a	99.5	Ctenolepisma	98	lineata	98	pilifera	98	A		Lineated Silverfish
	Class: Malacostraca = Malacostracans = Crayfish, Amphipods, Isopods, & kin
		Order: Amphipoda = Scuds & Sideswimmers
			Gammaridae	65	Gammarinae	65	Gammarini	65	Gammarus	65							Freshwater Scud
			Gammaridae	65	Gammarinae	65	Gammarini	65	Gammarus	65							Freshwater Scud
			Dogielinotidae	65	Hyalellinae	65	n/a	65	Hyalella	65	azteca	65					Sideswimmer
		Order: Decapoda = Decapods = Crayfish, Crabs, Lobsters, Prawns, Shrimp, & kin
			Cambaridae	99.9	Cambarinae	99.5	Cambarini	99.5	Procambarus	99.5	clarkii	99.5			A		Red Swamp Crawfish
		Order: Isopoda = Isopods
			Armadillidiidae	99.9	Armadillidiinae	99.9	n/a	99.9	Armadillidium	99.9	vulgare	99.9			A		Roly-poly
			Porcellionidae	99.9	Porcellioninae	99.9	n/a	99.9	Porcellio	99.9	scaber	99.5			A		Rough Woodlouse
	Class: Maxillopoda = Copepods, Barnacles, & kin
		Order: Eucopepoda = freeliving Copepods
			Cyclopidae	85	Cyclopinae	85	n/a	85	Cyclops	85							Cyclops Copepod
	Class: Ostracoda = Seed Shrimp
		Order: Podocopida = (ten-legged) Seed Shrimp
			Cyprididae	95	Cypridinae	95	n/a	95	Cypris	85	pubera	85					Freshwater Seed Shrimp
			Cyprididae	95	Cyprinotinae	85	n/a	85	Heterocypris	85	incongruens	70					Freshwater Seed Shrimp
			Cyprididae	85	Eucypridinae	65	n/a	65	Eucypris	65	virens	60					Freshwater Seed Shrimp
			Cyprididae	99.5	Herpetocypridinae	85	n/a	75	Herpetocypris	75	reptans	75					Freshwater Seed Shrimp
Phylum: Cnidaria = Jellies, Corals, Hydroids, & kin
	Class: Hydrozoa = Hydroids
		Order: Anthomedusae = Athecate Hydroids
			Hydridae	99.5	n/a	99.5	n/a	99.5	Hydra	99.5	americana	85					Freshwater Hydra
Phylum: Mollusca = Molluscs
	Class: Gastropoda = Snails & Slugs
		Order: Stylommatophora = Terrestrial Snails & Slugs
			Agriolimacidae	99.5	Agriolimacinae	99.5	n/a	99.5	Deroceras	99.5	panormitanum	99.5			A		Longneck Field Slug
			Agriolimacidae	99.5	Agriolimacinae	99.5	n/a	99.5	Lehmannia	99.5	valentiana	99.5			A		Three Band Garden Slug
			Subulinidae	99.9	Rumininae	99.9	Ruminini	99.9	Rumina	99.9	decollata	99.9			B		Decollate Snail
			Succineidae	99.9	Catinellinae	99.9	n/a	99.5	Catinella	99.5	rehderi	99					Amber Snail
			Valloniidae	99.5	Valloniinae	99.5	n/a	99.5	Vallonia	99.5	excentrica	85			A		Excentic Vallonia
			Vertiginidae	99.5	Vertigininae	99.5	Vertiginini	99.5	Nearctula	85	hemphilli	85					Vertigo
		Order: Basommatophora = Air-breathing Freshwater Snails
			Physidae	99.5	Physinae	99.5	Physellini	99.5	Physella	99.5	virgata	99.5					Freshwater Snail
			Planorbidae	99.5	Planorbinae	99.5	Planorbini	99.5	Planorbella	99.5	tenuis	99.5					Ramshorn Pond Snail
Phylum: Nematoda = Roundworms
	Class: Adenophorea = Roundworms
		Order: Gordea = (Soil) Roundworms
			Mononchidae	95													Predaceous Roundworm
	Class: Secernentea = Caudal Papillae Roundworms
		Order: Rhabditida = (Freeliving Soil) Roundworms [placement uncertain]
			Rhabditidae	51													Soil Roundworm
Phylum: Platyhelminthes = Flatworms
	Class: Turbellaria = (free-living) Flatworms
		Order: Tricladida = (freshwater+terrestrial) Flatworms
			Dugesiidae	85	n/a	85	n/a	85	Dugesia	85	tigrina	55					Freshwater Flatworm
			Planariidae	75	n/a	75	n/a	75	Phagocata	75	morgani	70					Freshwater Flatworm
Phylum: Rotifera = Rotifers = Wheel Animals
	Class: Monogononta = (single-gonad) Wheel Animals
		Order: Plioma = Freshwater Wheel Animals + kin
			Brachionidae	95	Brachioninae	85	n/a	85	Brachionus	65							Freshwater Wheel Animal
Phylum: Tardigrada = Tardigrades = Water Bears
	Class: Heterotardigrada = Water Bears (with head appendages)
		Order: Echiniscoidea = (Clawed) Water Bears
			Echiniscidae	55	n/a	55	n/a	55	Echiniscus	55							Freshwater Water Bear
